# Supplementary material for: Spore forming Actinobacterial diversity of Cholistan Desert Pakistan: Polyphasic taxonomy, antimicrobial potential and chemical profiling
Source: PubMed Central journal article supplement (PMC6387500; doi:10.1186/s12866-019-1414-x), 2019-02-22
Supplement: 12866_2019_1414_MOESM1_ESM.pdf [file 12866_2019_1414_MOESM1_ESM.pdf]

## Isolation media used for the Actinobacterial Diversity

Two different media were used. The recipes and cultural conditions used as followed:

### 1. Glycerol-casein-KNO<sub>3</sub> Agar

| Ingredients                          | Quantity |
|--------------------------------------|----------|
| Glycerol                             | 10.0g    |
| KNO <sub>3</sub>                     | 2.0g     |
| Casein                               | 0.3g     |
| NaCl                                 | 2.0g     |
| K <sub>2</sub> HPO <sub>4</sub>      | 2.0g     |
| MgSO <sub>4</sub> .7H <sub>2</sub> O | 0.05g    |
| CaCO <sub>3</sub>                    | 0.02g    |
| FeSO <sub>4</sub> .7H <sub>2</sub> O | 0.01g    |
| Agar                                 | 18.0g    |

Distilled water: 1000 liter, pH: 7.8

Sterilize by autoclaving at 15 lbs pressure (121°C) for 15 minutes. Agitate constantly while pouring into sterile Petri plates to obtain a uniform suspension. Incubation is done at 28°C for 5 to 7 days.

### 2. Actinomycete Isolation Agar

| Ingredients                          | Quantity |
|--------------------------------------|----------|
| Glycerol                             | 5.0g     |
| Sodium propionate                    | 4.0g     |
| Sodium caseinate                     | 2.0g     |
| Asparagine                           | 0.1g     |
| K <sub>2</sub> HPO <sub>4</sub>      | 0.5g     |
| MgSO <sub>4</sub> .7H <sub>2</sub> O | 0.1g     |
| FeSO <sub>4</sub> .7H <sub>2</sub> O | 0.001    |
| Agar                                 | 18.0g    |

Distilled water: 1000 liter, pH: 7.8

Sterilize by autoclaving at 15 lbs pressure (121°C) for 15 minutes. Agitate constantly while pouring into sterile Petri plates to obtain a uniform suspension. Incubation is done at 28°C for 5 to 7 days.
