# Supplementary material for: Spore forming Actinobacterial diversity of Cholistan Desert Pakistan: Polyphasic taxonomy, antimicrobial potential and chemical profiling
Source: PubMed Central journal article supplement (PMC6387500; doi:10.1186/s12866-019-1414-x), 2019-02-22
Supplement: 12866_2019_1414_MOESM2_ESM.pdf [file 12866_2019_1414_MOESM2_ESM.pdf]

**Table S1** Primary screening of all the isolated desert actinobacterial strains against MRSA by agar plug method

| Actinomycetes strains | *Zone of inhibition against MRSA | Actinomycetes strains | *Zone of inhibition against MRSA | Actinomycetes strains | *Zone of inhibition against MRSA | Actinomycetes strains | *Zone of inhibition against MRSA |
|-----------------------|----------------------------------|-----------------------|----------------------------------|-----------------------|----------------------------------|-----------------------|----------------------------------|
| AD1                   | 6                                | <b>AD29</b>           | <b>17</b>                        | <b>AD57</b>           | <b>20</b>                        | <b>AD85</b>           | <b>14</b>                        |
| AD2                   | 10                               | AD30                  | 10                               | AD58                  | 9                                | AD86                  | 9                                |
| <b>AD3</b>            | <b>18</b>                        | AD31                  | 11                               | <b>AD59</b>           | <b>17</b>                        | AD87                  | 9                                |
| AD4                   | 9                                | AD32                  | -                                | AD60                  | 10                               | AD88                  | -                                |
| AD5                   | -                                | AD33                  | 8                                | <b>AD61</b>           | <b>15</b>                        | <b>AD89</b>           | <b>16</b>                        |
| <b>AD6</b>            | <b>17</b>                        | <b>AD34</b>           | <b>17</b>                        | AD62                  | -                                | AD90                  | 8                                |
| AD7                   | 7                                | AD35                  | 8                                | <b>AD63</b>           | <b>17</b>                        | AD91                  | 8                                |
| AD8                   | 7                                | AD36                  | 9                                | AD64                  | 9                                | AD92                  | 9                                |
| AD9                   | 5                                | <b>AD37</b>           | <b>18</b>                        | AD65                  | 8                                | AD93                  | 10                               |
| <b>AD10</b>           | <b>19</b>                        | <b>AD38</b>           | <b>18</b>                        | AD66                  | 5                                | AD94                  | -                                |
| AD11                  | 18                               | AD39                  | 10                               | AD67                  | 9                                | AD95                  | -                                |
| AD12                  | -                                | AD40                  | -                                | <b>AD68</b>           | <b>18</b>                        | <b>AD96</b>           | <b>14</b>                        |
| AD13                  | 9                                | AD41                  | 9                                | <b>AD69</b>           | <b>19</b>                        | AD97                  | 9                                |
| AD14                  | 6                                | <b>AD42</b>           | <b>15</b>                        | AD70                  | -                                | AD98                  | 5                                |
| <b>AD15</b>           | <b>18</b>                        | AD43                  | 9                                | AD71                  | -                                | AD99                  | 6                                |
| AD16                  | 10                               | AD44                  | 8                                | AD72                  | -                                | <b>AD100</b>          | <b>14</b>                        |
| AD17                  | 9                                | AD45                  | 8                                | <b>AD73</b>           | <b>21</b>                        | AD101                 | -                                |
| AD18                  | 9                                | AD46                  | -                                | AD74                  | 9                                | AD102                 | -                                |
| AD19                  | -                                | AD47                  | -                                | AD75                  | 9                                | AD103                 | 9                                |
| <b>AD20</b>           | <b>15</b>                        | <b>AD48</b>           | <b>15</b>                        | <b>AD76</b>           | <b>16</b>                        | <b>AD104</b>          | <b>15</b>                        |
| <b>AD21</b>           | <b>17</b>                        | AD49                  | 7                                | AD77                  | 10                               | AD105                 | 8                                |
| AD22                  | 8                                | AD50                  | 6                                | AD78                  | -                                | AD106                 | 7                                |
| <b>AD23</b>           | <b>23</b>                        | AD51                  | 6                                | AD79                  | -                                | AD107                 | 18                               |
| AD24                  | 10                               | AD52                  | -                                | <b>AD80</b>           | <b>17</b>                        | <b>AD108</b>          | <b>7</b>                         |
| AD25                  | 7                                | AD53                  | 9                                | <b>AD81</b>           | <b>15</b>                        | AD109                 | 8                                |
| AD26                  | 7                                | <b>AD54</b>           | <b>17</b>                        | AD82                  | 9                                | AD110                 | 9                                |
| AD27                  | -                                | AD55                  | -                                | AD83                  | 9                                |                       |                                  |
| AD28                  | -                                | AD56                  | 9                                | AD84                  | -                                |                       |                                  |

\*zone of inhibition measured in mm; active strains are boldfaced in the whole collection
