# Supplementary material for: Spore forming Actinobacterial diversity of Cholistan Desert Pakistan: Polyphasic taxonomy, antimicrobial potential and chemical profiling
Source: PubMed Central journal article supplement (PMC6387500; doi:10.1186/s12866-019-1414-x), 2019-02-22
Supplement: 12866_2019_1414_MOESM3_ESM.pdf [file 12866_2019_1414_MOESM3_ESM.pdf]

**Table S2** Microbiological and biochemical characteristics of Cholistan desert actinobacterial strains

| Strains | Microbiological Characteristics<br>(Colony characteristics) |                   |               |      |       | Biochemical Characteristics<br>(Production of melanin and Utilization of different sugars as sole source of carbon) |        |        |        |        |   |   |             |   |
|---------|-------------------------------------------------------------|-------------------|---------------|------|-------|---------------------------------------------------------------------------------------------------------------------|--------|--------|--------|--------|---|---|-------------|---|
|         | Growth Pattern                                              | Diffused pigments | Consistency   | Size | Shape | P<br>O<br>M                                                                                                         | D<br>G | D<br>F | L<br>A | D<br>M | S | I | D<br>G<br>L | M |
| AFD31   | Good                                                        | No                | Hard embedded | 2mm  | Round | +                                                                                                                   | +      | +      | +      | +      | + | + | +           | + |
| AFD32   | Moderate                                                    | No                | Hard embedded | 2mm  | Round | -                                                                                                                   | +      | +      | +      | +      | + | + | +           | + |
| AFD33   | Minor                                                       | No                | -             | -    | -     | -                                                                                                                   | +      | -      | -      | -      | - | - | -           | - |
| AFD34   | Minor                                                       | No                | -             | 2mm  | -     | -                                                                                                                   | +      | -      | -      | -      | + | - | -           | - |
| AFD35   | Good                                                        | No                | -             | -    | -     | -                                                                                                                   | +      | -      | -      | +      | - | - | -           | + |
| AFD36   | Good                                                        | No                | -             | -    | -     | -                                                                                                                   | +      | -      | +      | -      | - | - | +           | + |
| AFD37   | Minor                                                       | No                | -             | 2mm  | Round | -                                                                                                                   | +      | -      | -      | -      | - | - | -           | + |
| AFD38   | Minor                                                       | No                | -             | -    | -     | -                                                                                                                   | +      | +      | +      | -      | - | + | -           | - |
| AFD39   | Minor                                                       | No                | -             | -    | -     | +                                                                                                                   | +      | +      | +      | +      | + | - | +           | - |
| AFD40   | Good                                                        | No                | Soft spores   | 2mm  | -     | -                                                                                                                   | +      | +      | -      | -      | + | + | -           | + |
| AFD41   | Minor                                                       | No                | -             | -    | -     | +                                                                                                                   | +      | -      | -      | +      | - | + | +           | + |
| AFD42   | Minor                                                       | No                | -             | -    | -     | -                                                                                                                   | +      | -      | -      | -      | - | - | -           | + |
| AFD43   | Light                                                       | No                | -             | -    | -     | -                                                                                                                   | +      | +      | +      | +      | - | - | -           | + |
| AFD44   | Light                                                       | No                | -             | -    | -     | -                                                                                                                   | +      | -      | +      | -      | - | - | -           | + |
| AFD45   | Light                                                       | No                | -             | -    | -     | -                                                                                                                   | +      | -      | -      | -      | - | - | +           | + |
| AFD46   | Minor                                                       | No                | -             | -    | -     | -                                                                                                                   | +      | -      | +      | -      | - | - | -           | + |
| AFD47   | Light                                                       | No                | -             | -    | -     | -                                                                                                                   | +      | -      | -      | -      | - | - | -           | + |
| AFD48   | Light                                                       | No                | Soft spores   | -    | Round | -                                                                                                                   | +      | -      | -      | -      | - | - | +           | + |
| AFD49   | Minor                                                       | No                | -             | -    | -     | -                                                                                                                   | +      | +      | -      | -      | + | - | -           | + |
| AFD50   | Minor                                                       | No                | -             | -    | -     | -                                                                                                                   | -      | +      | -      | -      | - | - | -           | + |
| AFD51   | Light                                                       | Yellow            | Soft spores   | -    | Round | +                                                                                                                   | +      | -      | -      | -      | - | + | -           | - |
| AFD52   | Minor                                                       | No                | -             | -    | -     | +                                                                                                                   | +      | +      | -      | +      | + | + | +           | + |
| AFD53   | Minor                                                       | No                | -             | -    | -     | -                                                                                                                   | +      | -      | -      | -      | - | - | -           | - |
| AFD54   | Minor                                                       | No                | -             | -    | -     | -                                                                                                                   | +      | -      | -      | -      | - | - | -           | + |
| AFD55   | Minor                                                       | No                | -             | -    | -     | -                                                                                                                   | +      | -      | +      | -      | - | - | -           | + |
| AFD56   | Moderate                                                    | No                | Hard embedded | -    | -     | +                                                                                                                   | +      | -      | -      | +      | - | + | -           | + |
| AFD57   | Moderate                                                    | Brown             | -             | 2mm  | Round | -                                                                                                                   | +      | +      | -      | +      | - | - | +           | + |
| AFD58   | Moderate                                                    | No                | -             | 2mm  | -     | -                                                                                                                   | +      | +      | +      | +      | - | - | +           | + |
| AFD59   | Minor                                                       | No                | -             | -    | Round | -                                                                                                                   | -      | -      | -      | -      | - | - | -           | - |
| AFD60   | Minor                                                       | No                | -             | 2mm  | -     | -                                                                                                                   | +      | +      | -      | +      | - | - | +           | + |
| AFD61   | Minor                                                       | No                | -             | -    | -     | -                                                                                                                   | +      | +      | -      | +      | + | - | +           | + |
| AFD62   | Good                                                        | No                | -             | 2mm  | -     | -                                                                                                                   | +      | +      | -      | +      | - | + | +           | + |
| AFD63   | Good                                                        | No                | -             | 2mm  | -     | +                                                                                                                   | +      | -      | +      | -      | + | + | +           | - |
| AFD64   | Minor                                                       | No                | -             | -    | -     | -                                                                                                                   | +      | -      | -      | -      | - | - | -           | - |
| AFD65   | Minor                                                       | No                | -             | -    | -     | -                                                                                                                   | +      | -      | +      | -      | - | + | -           | - |
| AFD66   | Light                                                       | No                | -             | -    | -     | -                                                                                                                   | +      | -      | -      | -      | - | - | +           | + |
| AFD67   | Light                                                       | No                | Soft          | -    | -     | -                                                                                                                   | +      | -      | -      | -      | - | - | -           | - |
| AFD68   | -                                                           | No                | -             | -    | -     | -                                                                                                                   | -      | -      | -      | -      | - | - | -           | - |
| AFD69   | Minor                                                       | No                | -             | -    | -     | -                                                                                                                   | -      | -      | -      | -      | - | - | -           | - |
| AFD70   | Minor                                                       | No                | Soft          | -    | -     | -                                                                                                                   | +      | -      | -      | -      | - | - | +           | - |
| AFD71   | Moderate                                                    | No                | Soft          | -    | -     | -                                                                                                                   | +      | -      | -      | +      | - | - | -           | + |
| AFD72   | Good                                                        | No                | -             | 2mm  | Round | -                                                                                                                   | +      | -      | +      | +      | - | - | +           | + |
| AFD73   | Good                                                        | No                | -             | 2mm  | Round | +                                                                                                                   | +      | -      | +      | -      | - | + | -           | + |
| AFD74   | Good                                                        | No                | -             | -    | -     | -                                                                                                                   | +      | +      | -      | -      | - | - | +           | + |
| AFD75   | Good                                                        | No                | Soft          | -    | -     | -                                                                                                                   | +      | +      | +      | -      | - | - | -           | + |
| AFD76   | -                                                           | -                 | -             | -    | -     | -                                                                                                                   | -      | -      | -      | -      | - | - | -           | - |
| AFD77   | Minor                                                       | No                | -             | -    | -     | +                                                                                                                   | +      | -      | -      | -      | - | - | -           | - |
| AFD78   | Minor                                                       | No                | -             | -    | -     | -                                                                                                                   | +      | -      | -      | -      | - | - | -           | - |
| AFD79   | Minor                                                       | No                | -             | -    | -     | -                                                                                                                   | +      | -      | -      | -      | - | - | -           | - |

|        |          |    |      |          |       |   |   |   |   |   |   |   |   |   |
|--------|----------|----|------|----------|-------|---|---|---|---|---|---|---|---|---|
| AFD80  | Minor    | No | -    | -        | -     | - | + | - | - | - | - | - | - | - |
| AFD81  | Minor    | No | -    | 2mm      | Round | - | + | - | - | - | - | - | - | - |
| AFD82  | Minor    | No | -    | 2mm      | -     | - | + | - | - | - | - | - | - | - |
| AFD83  | Minor    | No | -    | -        | -     | - | + | - | - | - | - | - | - | - |
| AFD84  | Minor    | No | -    | -        | -     | - | + | - | - | - | - | - | - | - |
| AFD85  | -        | -  | -    | -        | -     | - | - | - | - | - | - | - | - | - |
| AFD86  | Moderate | No | Soft | Pinpoint | -     | + | + | + | - | - | - | - | + | - |
| AFD87  | Moderate | No | -    | Pinpoint | Round | + | + | + | - | + | - | - | + | - |
| AFD88  | Moderate | No | -    | -        | -     | - | + | + | - | + | - | - | + | - |
| AFD89  | Good     | No | -    | -        | -     | + | - | - | - | - | - | - | + | - |
| AFD90  | Good     | No | -    | -        | -     | + | + | + | - | + | - | - | + | - |
| AFD91  | -        | -  | -    | -        | -     | - | - | - | - | - | - | - | - | - |
| AFD92  | Good     | No | Soft | -        | -     | + | + | + | - | + | - | - | + | - |
| AFD93  | Light    | No | Soft | Pinpoint | Round | - | + | - | - | - | - | - | - | - |
| AFD94  | Minor    | No | -    | -        | -     | - | + | - | - | - | - | - | - | - |
| AFD95  | Minor    | No | -    | -        | -     | - | + | - | - | - | - | - | - | - |
| AFD96  | Moderate | No | -    | -        | -     | + | - | + | - | + | - | - | + | - |
| AFD97  | -        | -  | -    | -        | -     | - | - | - | - | - | - | - | - | - |
| AFD98  | Moderate | No | -    | -        | -     | + | + | - | + | + | - | - | + | - |
| AFD99  | Moderate | No | -    | -        | -     | + | + | + | - | - | - | - | + | - |
| AFD100 | Moderate | No | Soft | -        | -     | - | + | + | - | - | - | - | + | - |
| AFD101 | Moderate | No | Soft | -        | -     | + | + | + | - | + | - | - | + | - |
| AFD102 | Good     | No | Soft | Pinpoint | Round | + | + | + | - | + | - | - | + | - |
| AFD103 | -        | -  | -    | -        | -     | - | - | - | - | - | - | - | - | - |
| AFD104 | Good     | No | -    | Pinpoint | -     | + | + | + | - | + | - | - | + | - |
| AFD105 | Good     | No | -    | -        | -     | + | + | + | - | + | - | - | + | - |
| AFD106 | Good     | No | -    | -        | -     | + | + | + | - | + | - | - | - | - |
| AFD107 | Minor    | No | -    | -        | -     | - | - | - | - | - | - | - | - | - |
| AFD108 | Good     | No | -    | -        | -     | + | - | - | - | - | - | - | - | - |
| AFD109 | Minor    | No | -    | -        | -     | - | + | - | - | - | - | - | - | - |
| AFD110 | Minor    | -  | -    | -        | -     | - | + | - | - | - | - | - | - | - |

**Key:** POM= production of melanin, DG=D-glucose, DF=D-fructose, LA=L-arabinose, DM=D-mannitol, S=Sucrose, I=Inositol, DGL=D-galactose, M=Mannose, (+) = positive result, (-) = negative result
