# Supplementary material for: Spore forming Actinobacterial diversity of Cholistan Desert Pakistan: Polyphasic taxonomy, antimicrobial potential and chemical profiling
Source: PubMed Central journal article supplement (PMC6387500; doi:10.1186/s12866-019-1414-x), 2019-02-22
Supplement: 12866_2019_1414_MOESM10_ESM.pdf [file 12866_2019_1414_MOESM10_ESM.pdf]

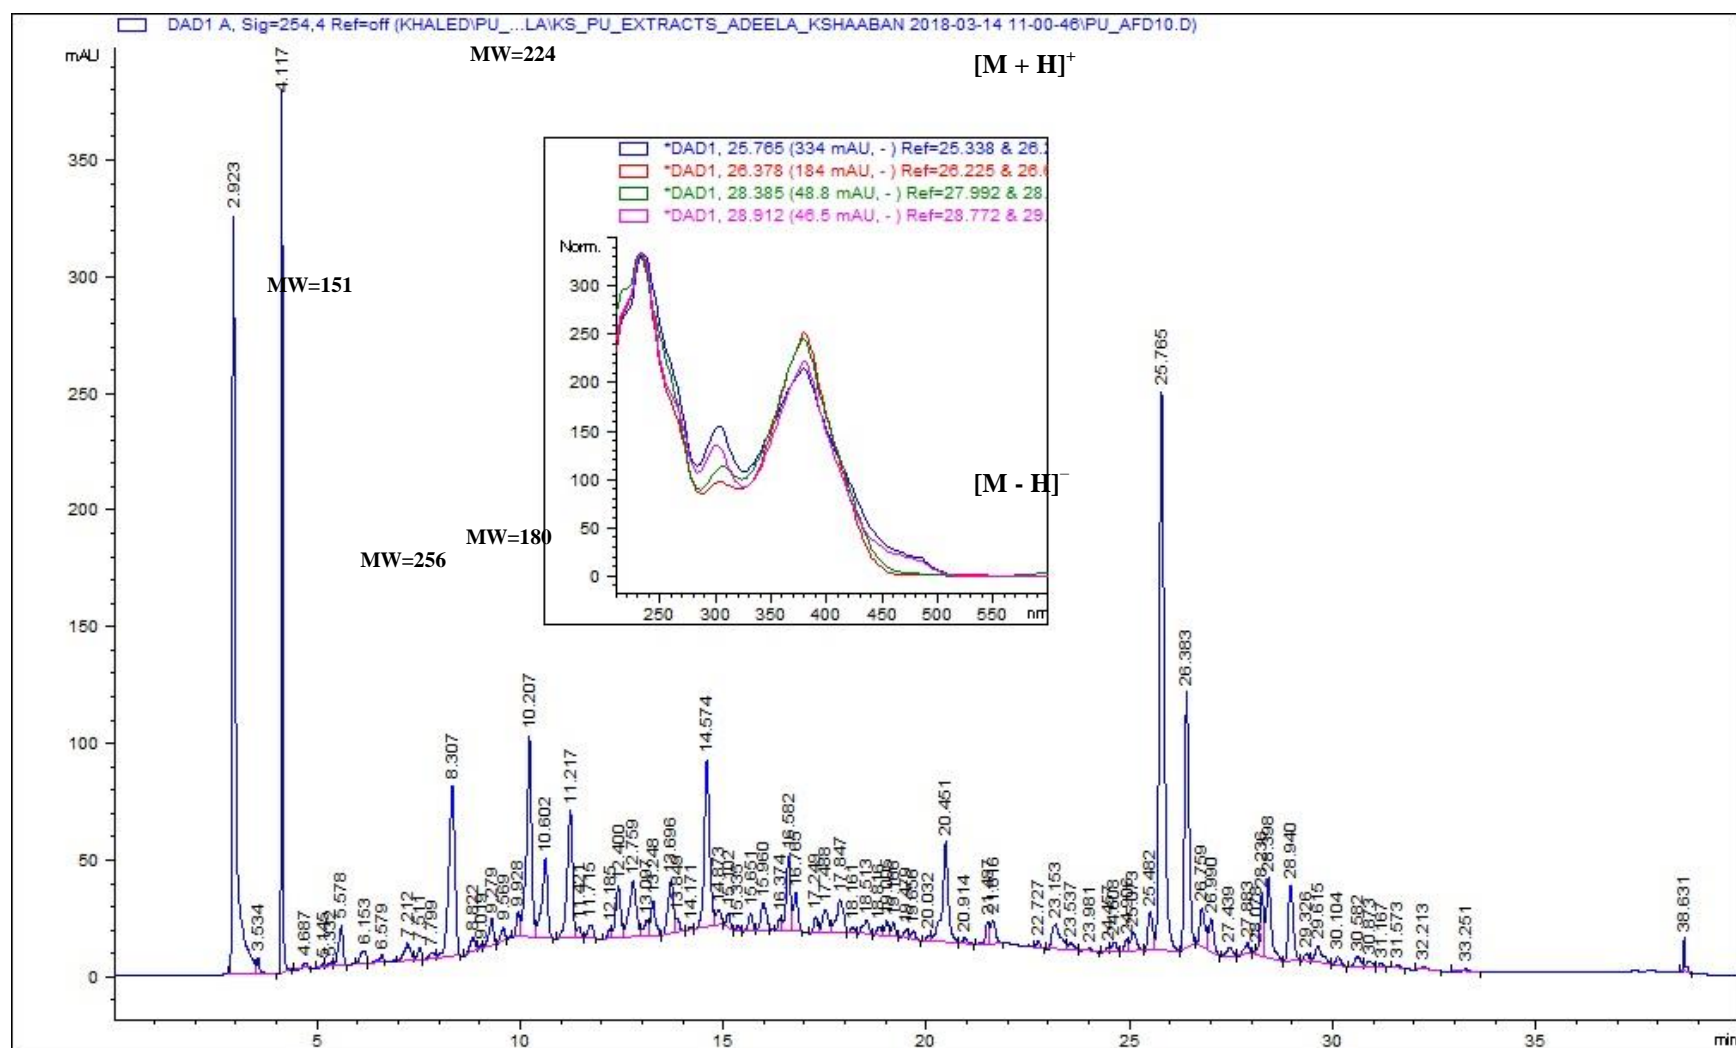

**Figure S11.** HPLC/UV analyses of AFD10 crude extract. HPLC-conditions: Detection wavelength 254 nm; solvent A: H<sub>2</sub>O/0.1% TFA; solvent B: acetonitrile; flow rate: 1.0 mL min<sup>-1</sup>; 0-30 min, 95-0% A (linear gradient); 30-35 min 0% A; 35-36 min 0-95% A (linear gradient); 36-40 min 95% A.
