# Supplementary material for: Spore forming Actinobacterial diversity of Cholistan Desert Pakistan: Polyphasic taxonomy, antimicrobial potential and chemical profiling
Source: PubMed Central journal article supplement (PMC6387500; doi:10.1186/s12866-019-1414-x), 2019-02-22
Supplement: 12866_2019_1414_MOESM18_ESM.pdf [file 12866_2019_1414_MOESM18_ESM.pdf]

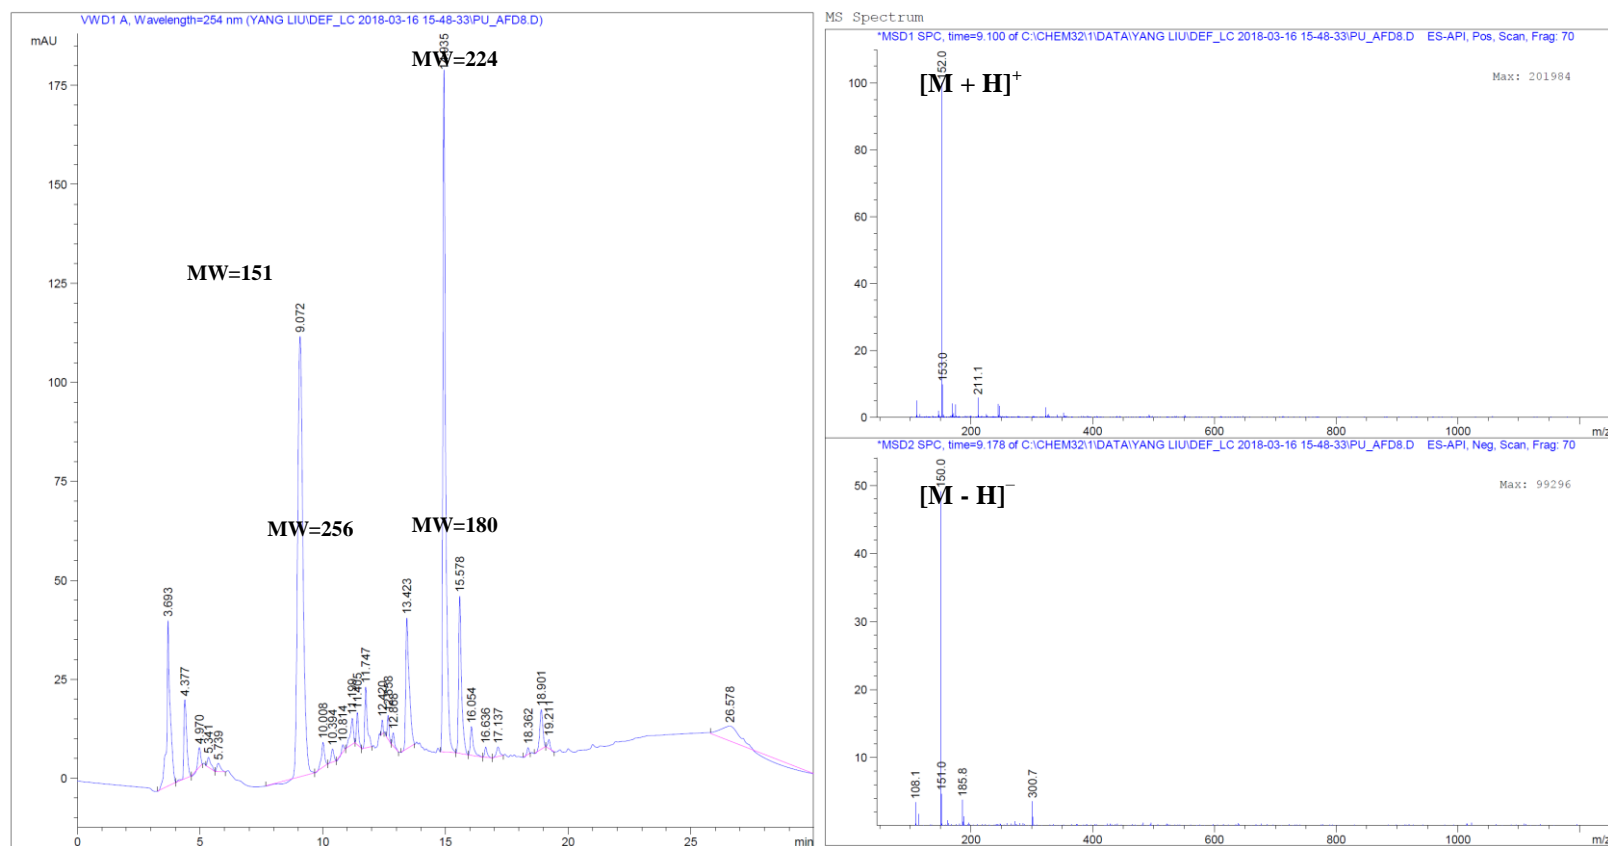

**Figure S10.** HPLC/MS analyses of AFD8 crude extract. HPLC-conditions: Detection wavelength 254 nm; solvent A: H<sub>2</sub>O/0.1% Formic acid, solvent B: CH<sub>3</sub>CN/0.1% Formic acid; flow rate: 0.5 mL min<sup>-1</sup>; 0-4 min, 10% B; 4-22 min, 10-100% B; 22-27 min, 100% B; 27-29 min, 100%-10% B; 29-30 min, 10% B. (MW = Molecular Weight)
