# Supplementary material for: Spore forming Actinobacterial diversity of Cholistan Desert Pakistan: Polyphasic taxonomy, antimicrobial potential and chemical profiling
Source: PubMed Central journal article supplement (PMC6387500; doi:10.1186/s12866-019-1414-x), 2019-02-22
Supplement: 12866_2019_1414_MOESM20_ESM.pdf [file 12866_2019_1414_MOESM20_ESM.pdf]

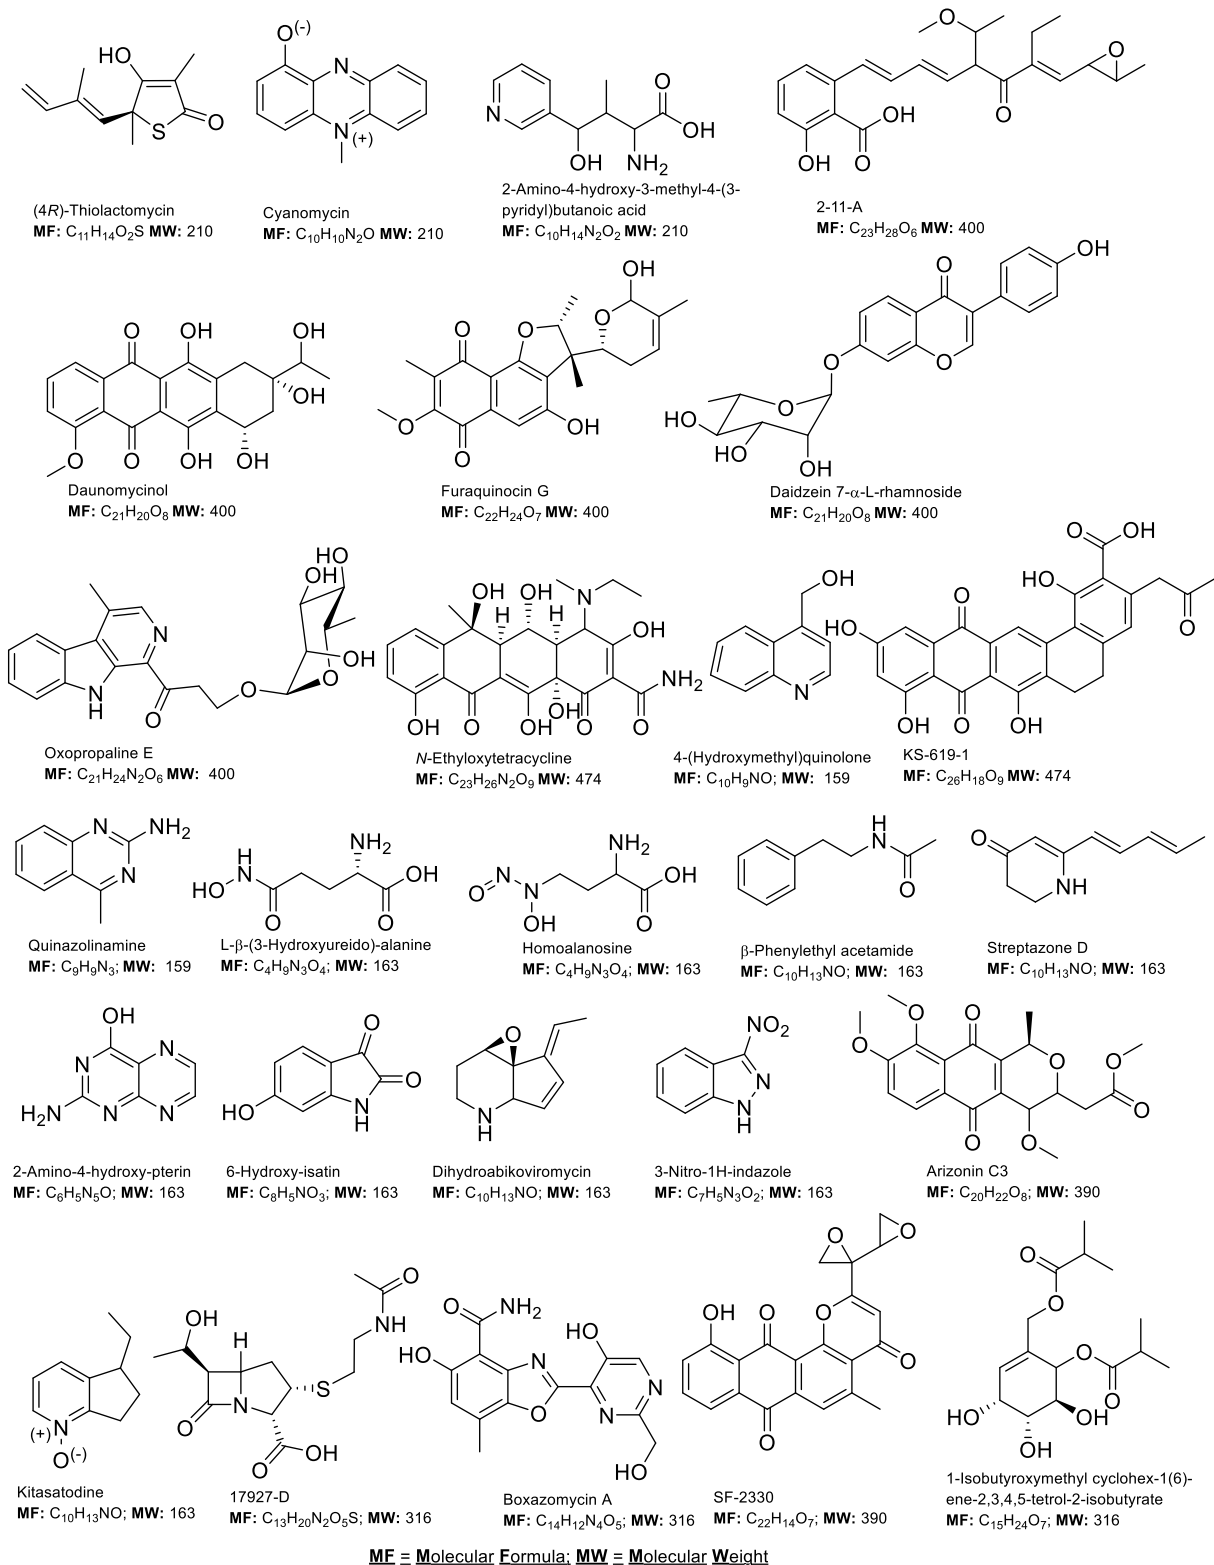

**Figure S20:** Chemical structures of the suggested *Streptomyces* metabolites based on HPLC-UV/Vis and LC-MS analyses and by searching in *AntiBase* 2017.
